# Supplementary material for: A Minimalistic Resource Allocation Model to Explain Ubiquitous Increase in Protein Expression with Growth Rate
Source: PubMed Central journal article supplement (PMC4830519; doi:10.1371/journal.pone.0153344), 2016-04-13
Supplement: pone.0153344.s001.pdf [file pone.0153344.s001.pdf]

## S1 Text

### Effects of degradation and varying synthesis rate on model predictions

The predicted fraction of an unregulated protein as a function of the growth rate is to follow a linear trend crossing at the origin (S1 Fig, blue dots). Degradation can be interpreted as implying that the observed growth rate is the combination of the bio-synthesis rate minus the degradation rate, implying that the predicted fraction of an unregulated protein is linear increase with growth rate, but with a horizontal intercept at minus the degradation rate as is shown by the green dots in S1 Fig.

Non constant bio-synthesis rate can be modeled as a Michaelis-Menten kinetic like interdependence with growth rate following the formula:

$$\eta(g(c)) = \frac{\eta_0}{1 + \frac{g_m}{g(c)}} \quad (\text{S1})$$

where  $g(c)$  is the growth rate,  $\eta(g(c))$  is the bio-synthesis rate at growth rate  $g(c)$ ,  $\eta_0$  is the maximal bio-synthesis rate and  $g_m$  the growth rate at which the bio-synthesis rate is  $\frac{1}{2}$  the maximal rate (S1 Fig, red line). Under this assumption, the doubling time of the bio-synthesis machinery itself,  $T_B$  becomes:

$$T_B = T_B^0 \frac{\eta(g(c))}{\eta_0} = T_B^0 \left(1 + \frac{g_m}{g(c)}\right) \quad (\text{S2})$$

where  $T_B^0$  is the minimal theoretical doubling time when all the proteins are bio-synthesis proteins operating at maximal rate. Substituting Eq.(S2) into Eq.(4) results in a predicted fraction of:

$$p_i(c) = \frac{w_i(c)}{W_B} \frac{T_B^0 \left(1 + \frac{g_m}{g(c)}\right)}{\ln(2)} g(c) = \frac{w_i(c)}{W_B} \frac{T_B^0}{\ln(2)} (g(c) + g_m) \quad (\text{S3})$$

Surprisingly, this equation also describes the fraction as being linearly dependent on the growth rate, with the kinetic parameters implying a non-zero fraction at zero growth rate as is shown by the red dots in S1 Fig.
