# Supplementary material for: A Minimalistic Resource Allocation Model to Explain Ubiquitous Increase in Protein Expression with Growth Rate
Source: PubMed Central journal article supplement (PMC4830519; doi:10.1371/journal.pone.0153344), 2016-04-13
Supplement: pone.0153344.s014.pdf [file pone.0153344.s014.pdf]

## S1 Table

Breakdown by function of strongly positively correlated with growth rate proteins in the data set from [29].

| Function                                  | Number of proteins | % of proteome        | Correlated proteins | Correlated % of proteome |
|-------------------------------------------|--------------------|----------------------|---------------------|--------------------------|
| NotMapped                                 | 533                | 24.55                | 163                 | 10.99                    |
| Carbohydrate Metabolism                   | 113                | 20.9                 | 21                  | 4.53                     |
| Translation                               | 110                | 13.81                | 81                  | 12.67                    |
| Amino Acid Metabolism                     | 92                 | 9.48                 | 41                  | 7.62                     |
| Membrane Transport                        | 70                 | 6.49                 | 5                   | 0.31                     |
| Folding, Sorting and Degradation          | 97                 | 6.07                 | 37                  | 3                        |
| Energy Metabolism                         | 41                 | 3.71                 | 13                  | 0.63                     |
| Nucleotide Metabolism                     | 57                 | 3.58                 | 29                  | 1.62                     |
| Transcription                             | 48                 | 2.93                 | 12                  | 0.27                     |
| Other enzymes                             | 64                 | 2.87                 | 22                  | 0.31                     |
| Lipid Metabolism                          | 30                 | 1.11                 | 4                   | 0.15                     |
| DNA maintenance                           | 45                 | 1.01                 | 11                  | 0.13                     |
| Metabolism of Cofactors and Vitamins      | 53                 | 0.81                 | 16                  | 0.33                     |
| Metabolism of Other Amino Acids           | 19                 | 0.8                  | 7                   | 0.48                     |
| Signal Transduction                       | 28                 | 0.64                 | 2                   | $5.79 \cdot 10^{-3}$     |
| Cell Motility                             | 2                  | 0.59                 | 0                   | 0                        |
| Cytoskeleton                              | 5                  | 0.3                  | 2                   | 0.13                     |
| Glycan Biosynthesis and Metabolism        | 13                 | 0.22                 | 3                   | $3.59 \cdot 10^{-2}$     |
| Metabolism of Terpenoids and Polyketides  | 13                 | $8.75 \cdot 10^{-2}$ | 1                   | $1.36 \cdot 10^{-2}$     |
| Not mapped                                | 7                  | $2.79 \cdot 10^{-2}$ | 2                   | $3.15 \cdot 10^{-3}$     |
| Xenobiotics Biodegradation and Metabolism | 2                  | $1.96 \cdot 10^{-2}$ | 1                   | $1.79 \cdot 10^{-2}$     |
