# Supplementary material for: A Minimalistic Resource Allocation Model to Explain Ubiquitous Increase in Protein Expression with Growth Rate
Source: PubMed Central journal article supplement (PMC4830519; doi:10.1371/journal.pone.0153344), 2016-04-13
Supplement: pone.0153344.s015.pdf [file pone.0153344.s015.pdf]

## S2 Table

Breakdown by function of strongly positively correlated with growth rate proteins in the data set from [13].

| Function                                  | Number of proteins | % of proteome        | Correlated proteins | Correlated % of proteome |
|-------------------------------------------|--------------------|----------------------|---------------------|--------------------------|
| NotMapped                                 | 387                | 23.86                | 67                  | 8.81                     |
| Carbohydrate Metabolism                   | 104                | 20.58                | 19                  | 4.11                     |
| Translation                               | 97                 | 17.65                | 79                  | 17.05                    |
| Membrane Transport                        | 65                 | 8.89                 | 5                   | 0.24                     |
| Amino Acid Metabolism                     | 81                 | 6.27                 | 20                  | 1.23                     |
| Folding, Sorting and Degradation          | 82                 | 5.01                 | 23                  | 1.86                     |
| Energy Metabolism                         | 41                 | 4.28                 | 19                  | 2.79                     |
| Nucleotide Metabolism                     | 47                 | 3.62                 | 30                  | 2.9                      |
| Transcription                             | 33                 | 2.58                 | 7                   | 1.36                     |
| Other enzymes                             | 46                 | 2.11                 | 5                   | $8.53 \cdot 10^{-2}$     |
| Lipid Metabolism                          | 18                 | 1.29                 | 5                   | 0.59                     |
| DNA maintenance                           | 33                 | 1.14                 | 5                   | 0.17                     |
| Metabolism of Cofactors and Vitamins      | 39                 | 0.72                 | 8                   | 0.25                     |
| Metabolism of Other Amino Acids           | 17                 | 0.65                 | 4                   | 0.44                     |
| Cell Motility                             | 5                  | 0.43                 | 1                   | $4.98 \cdot 10^{-2}$     |
| Signal Transduction                       | 23                 | 0.31                 | 5                   | $3.92 \cdot 10^{-2}$     |
| Cytoskeleton                              | 5                  | 0.27                 | 0                   | 0                        |
| Glycan Biosynthesis and Metabolism        | 10                 | 0.23                 | 2                   | $7.49 \cdot 10^{-2}$     |
| Metabolism of Terpenoids and Polyketides  | 7                  | $5.21 \cdot 10^{-2}$ | 1                   | $1.51 \cdot 10^{-2}$     |
| Xenobiotics Biodegradation and Metabolism | 2                  | $5.14 \cdot 10^{-2}$ | 0                   | 0                        |
